# Supplementary material
Source: MDPI journal article supplement (https://www.mdpi.com/2073-4441/13/11/1533)
Supplement: s1 [file s1]

## SUPPLEMENTARY MATERIAL

### Microbial life in nutrient depleted aquatic habitats - results of cultivation and molecular studies

Marwene Toumi<sup>1\*</sup>, Gorkhmaz Abbaszade<sup>1</sup>, Yousra Sbaoui<sup>2</sup>, Rózsa Farkas<sup>1</sup>, Éva Ács<sup>3, 4</sup>, Laura Jurecska<sup>1</sup>, Erika Tóth<sup>1</sup>

<sup>1</sup>Department of Microbiology, ELTE Eötvös Loránd University, Pázmány Péter stny. 1/C, H-1117 Budapest, Hungary

<sup>2</sup>Health and Environment Laboratory, Hassan II University of Casablanca, Morocco

<sup>3</sup>MTA Centre for Ecological Research, Balaton Limnological Institute, Hungarian Academy of Sciences, Klebelsberg Kuno u. 3., 8237 Tihany, Hungary

<sup>4</sup>University of Public Service, Faculty of Water Sciences, Budapest, Hungary

**Table S1.** Archaeal species richness and diversity indices calculated from 16S rRNA gene amplicon sequencing data.

| Sample          | nseqs | sobs | ace      | ace_lci  | ace_hci  | chao     | chao_lci |
|-----------------|-------|------|----------|----------|----------|----------|----------|
| Ciprián         | 2242  | 275  | 282.2016 | 277.9844 | 292.3784 | 276.663  | 275.3581 |
| Dandár_1        | 2242  | 37   | 44.96296 | 39.34455 | 64.04514 | 52       | 40.50249 |
| Dandár_2        | 2242  | 44   | 104.0403 | 76.60437 | 154.5631 | 82.5     | 57.06271 |
| Dandár_3        | 2242  | 60   | 74.04633 | 65.53356 | 95.65509 | 81.85714 | 66.98085 |
| Dandár_4        | 2242  | 68   | 75.88787 | 70.84288 | 89.88569 | 74.06667 | 69.68132 |
| Szentendre_1    | 2242  | 872  | 1583.405 | 1451.704 | 1745.026 | 1408.361 | 1292.972 |
| Szentendre_2    | 2242  | 814  | 1956.697 | 1808.565 | 2126.891 | 1394.603 | 1266.37  |
| Szentendre_3    | 2242  | 790  | 2176.337 | 2003.755 | 2373.458 | 1502.796 | 1344.547 |
| Szent Flórián_1 | 2242  | 194  | 248.6622 | 226.0897 | 287.1127 | 240.6667 | 217.9046 |
| Szent Flórián_2 | 2242  | 191  | 251.9538 | 227.258  | 293.4701 | 256.3571 | 225.1055 |
| Szent_Flórián_3 | 2242  | 189  | 246.731  | 223.4361 | 285.7843 | 240.6563 | 215.7164 |
| Tatabánya       | 2242  | 685  | 1585.752 | 1458.691 | 1733.679 | 1147.697 | 1035.679 |

| Sample          | chao_hci | invsimpson | invsimpson_lci | invsimpson_hci | shannon  | shannon_lci |
|-----------------|----------|------------|----------------|----------------|----------|-------------|
| Ciprián         | 282.7237 | 32.03878   | 28.85436       | 36.01328       | 4.562843 | 4.494772    |
| Dandár_1        | 101.2401 | 2.32628    | 2.20938        | 2.456241       | 1.477513 | 1.411318    |
| Dandár_2        | 157.4718 | 2.994928   | 2.881867       | 3.117223       | 1.481256 | 1.425879    |
| Dandár_3        | 128.435  | 2.768636   | 2.656855       | 2.890237       | 1.594868 | 1.524744    |
| Dandár_4        | 89.89016 | 3.022236   | 2.908833       | 3.144839       | 1.670845 | 1.600057    |
| Szentendre_1    | 1555.38  | 217.2022   | 188.615        | 256.003        | 6.184313 | 6.128952    |
| Szentendre_2    | 1559.187 | 113.8012   | 97.74928       | 136.1608       | 5.940844 | 5.876292    |
| Szentendre_3    | 1706.204 | 58.00284   | 50.50723       | 68.11096       | 5.668637 | 5.591798    |
| Szent_Flórián_1 | 285.103  | 36.46891   | 34.00308       | 39.32034       | 4.202421 | 4.146212    |
| Szent_Flórián_2 | 316.2455 | 29.56005   | 27.39909       | 32.09107       | 4.073393 | 4.013766    |
| Szent_Flórián_3 | 288.8776 | 30.3057    | 28.46131       | 32.40571       | 4.019129 | 3.960142    |
| Tatabánya       | 1295.498 | 53.55963   | 46.40783       | 63.31731       | 5.525372 | 5.450833    |

**Table S2.** Bacterial species richness and diversity indices calculated from 16S rRNA gene amplicon sequencing.

| Sample          | nseqs | sobs | ace      | ace_lci  | ace_hci  | chao     | chao_lci |
|-----------------|-------|------|----------|----------|----------|----------|----------|
| Ciprián         | 6670  | 424  | 1827.383 | 1586.973 | 2117.491 | 994.8571 | 835.9699 |
| Dandár_1        | 6670  | 256  | 258.0841 | 256.4938 | 264.7962 | 256.1389 | 256.0075 |
| Dandár_2        | 6670  | 306  | 352.4726 | 334.5715 | 381.5892 | 353.0426 | 331.489  |
| Dandár_3        | 6670  | 400  | 437.9379 | 423.2789 | 461.8279 | 426.3919 | 413.7966 |
| Dandár_4        | 6670  | 338  | 378.0644 | 362.405  | 403.7717 | 373.5091 | 356.8245 |
| Szentendre_1    | 6670  | 3985 | 6489.51  | 6232.384 | 6776.055 | 5841.957 | 5650.409 |
| Szentendre_2    | 6670  | 3674 | 7771.324 | 7366.765 | 8220.205 | 6558.875 | 6255.696 |
| Szentendre_3    | 6670  | 3145 | 5910.811 | 5620.837 | 6234.748 | 5182.722 | 4944.693 |
| Szent_Flórián_1 | 6670  | 836  | 1213.576 | 1136.461 | 1310.484 | 1117.783 | 1047.51  |
| Szent_Flórián_2 | 6670  | 1331 | 3263.716 | 3066.964 | 3482.769 | 2233.4   | 2070.2   |
| Szent_Flórián_3 | 6670  | 780  | 1076.424 | 1012.773 | 1157.481 | 1015.291 | 953.8627 |
| Tatabánya       | 6670  | 866  | 3324.817 | 3049.071 | 3635.393 | 1834.085 | 1633.085 |

| Sample          | chao_hci | invsimpson | invsimpson_lci | invsimpson_hci | shannon  | shannon_lci | shannon_hci |
|-----------------|----------|------------|----------------|----------------|----------|-------------|-------------|
| Ciprián         | 1215.023 | 2.439123   | 2.360241       | 2.52346        | 1.95568  | 1.898044    | 2.013316    |
| Dandár_1        | 258.5795 | 8.232099   | 7.784089       | 8.734828       | 3.555161 | 3.504287    | 3.606036    |
| Dandár_2        | 392.8217 | 12.20819   | 11.61044       | 12.87084       | 3.699926 | 3.65208     | 3.747773    |
| Dandár_3        | 450.4859 | 28.68855   | 26.71251       | 30.98031       | 4.590216 | 4.548374    | 4.632059    |
| Dandár_4        | 404.9816 | 15.59544   | 14.73188       | 16.56656       | 4.012899 | 3.965906    | 4.059891    |
| Szentendre_1    | 6055.536 | 3708.089   | 3344.482       | 4160.4         | 8.111344 | 8.090392    | 8.132296    |
| Szentendre_2    | 6897.658 | 1879.425   | 1706.747       | 2090.977       | 7.886787 | 7.860847    | 7.912728    |
| Szentendre_3    | 5452.232 | 637.9576   | 559.6759       | 741.6988       | 7.57154  | 7.539546    | 7.603533    |
| Szent_Flórián_1 | 1211.404 | 73.96619   | 69.7471        | 78.72857       | 5.344894 | 5.303592    | 5.386195    |
| Szent_Flórián_2 | 2432.632 | 69.23972   | 63.95926       | 75.47056       | 5.717254 | 5.670162    | 5.764346    |
| Szent_Flórián_3 | 1098.422 | 31.57442   | 29.47941       | 33.98997       | 4.925548 | 4.876343    | 4.974753    |

|           |          |          |          |          |          |          |          |
|-----------|----------|----------|----------|----------|----------|----------|----------|
| Tatabánya | 2087.755 | 9.023826 | 8.704551 | 9.367415 | 3.556589 | 3.494184 | 3.618995 |
|-----------|----------|----------|----------|----------|----------|----------|----------|

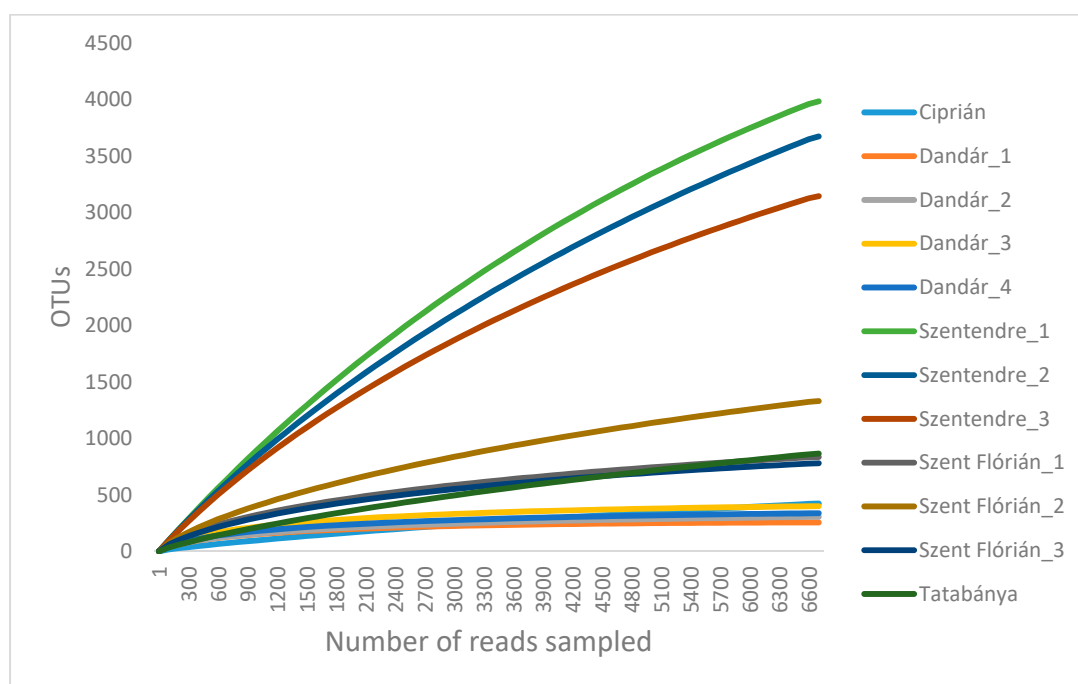

**Figure S1.** Rarefaction curves of bacterial OTUs of the samples based on 16S rRNA gene amplicon sequencing

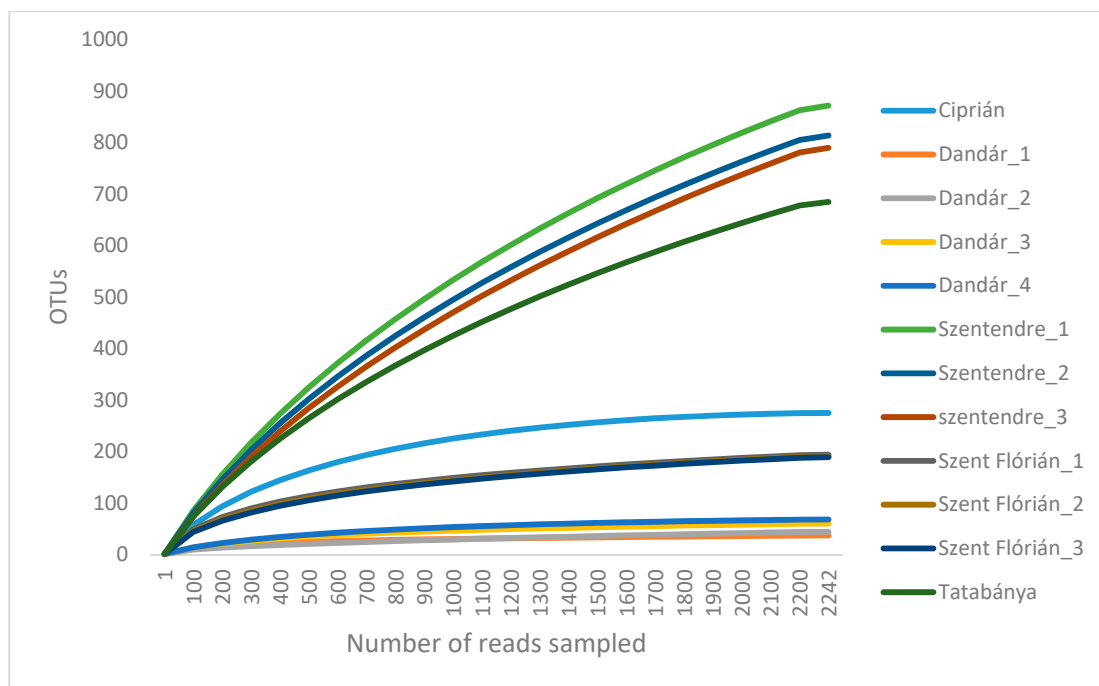

**Figure S2.** Rarefaction curves of archaeal OTUs of the samples based on 16S rRNA gene amplicon sequencing

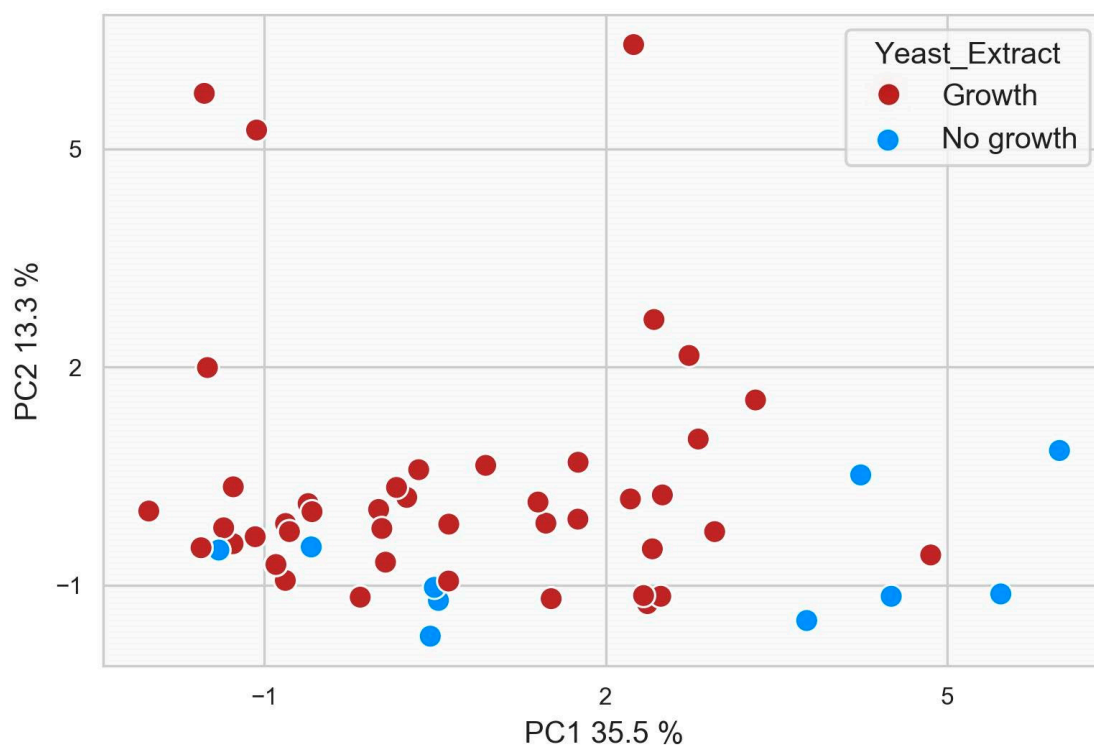

**Figure S3.** PCA ordination of the bacterial strains growth in 100% yeast extract medium

**Table S3.** Results of taxonomic identification of group representative bacterial strains using 16S rRNA gene sequencing.

| Name           | Closest related type strain (EZbiocloud) | Similarity (%) | Phylum                | Number of isolates |
|----------------|------------------------------------------|----------------|-----------------------|--------------------|
| SG_E_30_P1*    | <i>Salinibacterium hongtaonis</i>        | 96.33          | <i>Actinobacteria</i> | 3                  |
| SG_E_28_P3*    | <i>Paenibacillus sinopodophylli</i>      | 97.97          | <i>Firmicutes</i>     | 9                  |
| SG_E_25_P2*    | <i>Rhizobium alvei</i>                   | 96.44          | <i>Proteobacteria</i> | 1                  |
| SG_23_I_P2_1_T | <i>Moraxella osloensis</i>               | 99.1           | <i>Proteobacteria</i> | 1                  |
| SG_18_I_P      | <i>Pararhizobium herbae</i>              | 99.33          | <i>Proteobacteria</i> | 1                  |
| SG_16_I_P3     | <i>Streptomyces tateyamensis</i>         | 98.86          | <i>Actinobacteria</i> | 2                  |
| SG_6_I         | <i>Microbacterium tumbae</i>             | 98.45          | <i>Actinobacteria</i> | 1                  |

|              |                                          |       |                 |    |
|--------------|------------------------------------------|-------|-----------------|----|
| SA_E_32_P2_2 | <i>Brevibacillus nitrificans</i>         | 96.61 | Firmicutes      | 4  |
| SA_E_31_P2   | <i>Prostheco bacter algae</i>            | 99.62 | Verrucomicrobia | 2  |
| SA_E_8_P3    | <i>Microbacterium keratanolyticum</i>    | 99.46 | Actinobacteria  | 2  |
| SA_E_7_P1    | <i>Ancylobacter rudongensis</i>          | 99.81 | Proteobacteria  | 2  |
| SA_E_5_P2    | <i>Paenibacillus tundrae</i>             | 99.72 | Firmicutes      | 1  |
| SA_E_2_P2    | <i>Flectobacillus roseus</i>             | 99.27 | Bacteroidetes   | 15 |
| SA_19_I*     | <i>Sphingobium aquiterrae</i>            | 97.74 | Proteobacteria  | 2  |
| SA_3_I_P1    | <i>Streptomyces rhizosphaerihabitans</i> | 99.08 | Actinobacteria  | 1  |
| SG_E_30_P3   | <i>Variovorax boronicumulans</i>         | 99.41 | Proteobacteria  | 1  |
| SG_E_25_P3   | <i>Pedobacter miscanthi</i>              | 97.9  | Bacteroidetes   | 1  |
| SG_E_24      | <i>Verrucomicrobium spinosum</i>         | 99.81 | Verrucomicrobia | 1  |
| SG_25_I_P1   | <i>Massilia lutea</i>                    | 99.03 | Proteobacteria  | 2  |
| SG_24_I      | <i>Sphingomonas aerolata</i>             | 100   | Proteobacteria  | 1  |
| SG_17_I_P1   | <i>Bacillus simplex</i>                  | 100   | Firmicutes      | 1  |
| SG_8_I       | <i>Streptomyces scabiei</i>              | 99.87 | Actinobacteria  | 1  |
| SG_5_I       | <i>Variovorax paradoxus</i>              | 99.63 | Proteobacteria  | 3  |
| SA_E_40      | <i>Ferro vibrio soli</i>                 | 99.15 | Proteobacteria  | 1  |
| SA_E_39      | <i>Lysinibacillus fusiformis</i>         | 100   | Firmicutes      | 1  |
| SA_E_34_P2   | <i>Bacillus mycoides</i>                 | 100   | Firmicutes      | 1  |
| SA_E_34_P1   | <i>Azospirillum largimobile</i>          | 98.76 | Proteobacteria  | 1  |
| SA_E_32_P3   | <i>Caulobacter mirabilis</i>             | 99.12 | Proteobacteria  | 1  |
| SA_E_15_P1   | <i>Brevundimonas terrae</i>              | 99.48 | Proteobacteria  | 1  |
| SA_E_12      | <i>Paenibacillus typhae</i>              | 99.71 | Firmicutes      | 1  |
| SA_E_4_P1    | <i>Pararhizobium giardinii</i>           | 98.25 | Proteobacteria  | 2  |
| SA_E_3       | <i>Taonella mepensis</i>                 | 99.81 | Proteobacteria  | 1  |
| SA_20_I_P    | <i>Bacillus timonensis</i>               | 99.45 | Firmicutes      | 1  |
| SA_16_I_P    | <i>Pseudomonas lini</i>                  | 99.89 | Proteobacteria  | 1  |
| SA_6_I       | <i>Streptomyces umbrinus</i>             | 99.04 | Actinobacteria  | 1  |
| SA_1_I_P1*   | <i>Flavobacterium granuli</i>            | 97.53 | Bacteroidetes   | 1  |
| SG_15_I      | <i>Agromyces fucosus</i>                 | 99.9  | Actinobacteria  | 1  |
| SA_15_I      | <i>Ensifer adhaerens</i>                 | 99.31 | Proteobacteria  | 1  |
| SA_9_I       | <i>Pigmentiphaga aceris</i>              | 99.51 | Proteobacteria  | 1  |

|             |                                         |       |                       |    |
|-------------|-----------------------------------------|-------|-----------------------|----|
| FG_E_46     | <i>Microbacterium paraoxydans</i>       | 99.27 | <i>Actinobacteria</i> | 9  |
| FG_E_32_P2  | <i>Microbacterium oxydans</i>           | 99.64 | <i>Actinobacteria</i> | 5  |
| FG_E_20     | <i>Pseudoxanthomonas mexicana</i>       | 99.17 | <i>Proteobacteria</i> | 1  |
| FA_E_42_P2* | <i>Paracoccus acridae</i>               | 97.75 | <i>Proteobacteria</i> | 4  |
| FA_E_40     | <i>Aurantimonas altamirensis</i>        | 99.55 | <i>Proteobacteria</i> | 9  |
| FA_E_13     | <i>Novosphingobium lindaniclasticum</i> | 98.83 | <i>Proteobacteria</i> | 4  |
| FG_E_32_P1  | <i>Flavobacterium mizutaii</i>          | 99.62 | <i>Bacteroidetes</i>  | 11 |
| FA_E_42_P2  | <i>Paracoccus haematequi</i>            | 100   | <i>Proteobacteria</i> | 1  |
| FA_E_3_P2   | <i>Bosea robiniae</i>                   | 99.43 | <i>Proteobacteria</i> | 1  |
| CG_E_11_P2  | <i>Achromobacter deleyi</i>             | 99.56 | <i>Proteobacteria</i> | 2  |
| CG_E_6_P1   | <i>Bacillus idriensis</i>               | 99.55 | <i>Firmicutes</i>     | 2  |
| CG_22_I     | <i>Rhodobacter azotoformans</i>         | 96.91 | <i>Proteobacteria</i> | 2  |
| CG_19_I     | <i>Curvibacter delicatus</i>            | 99.53 | <i>Proteobacteria</i> | 5  |
| CG_14_I*    | <i>Rheinheimera mesophila</i>           | 97.9  | <i>Proteobacteria</i> | 2  |
| CA_E_2*     | <i>Dyadobacter hamtensis</i>            | 97.89 | <i>Bacteroidetes</i>  | 1  |
| CA_18_I_P   | <i>Rhodoferrax antarcticus</i>          | 98.55 | <i>Proteobacteria</i> | 1  |
| CA_3_I_P1   | <i>Hydrogenophaga taeniospiralis</i>    | 98.61 | <i>Proteobacteria</i> | 3  |
| CG_E_16_P   | <i>Pseudomonas wadenswilerensis</i>     | 98.95 | <i>Proteobacteria</i> | 1  |
| CG_E_11_P1  | <i>Devosia riboflavina</i>              | 100   | <i>Proteobacteria</i> | 1  |
| CG_E_5      | <i>Paenibacillus tritici</i>            | 100   | <i>Firmicutes</i>     | 1  |
| CG_E_1      | <i>Paenibacillus populi</i>             | 99.43 | <i>Firmicutes</i>     | 7  |
| CG_20_I     | <i>Flavobacterium sasangense</i>        | 98.47 | <i>Bacteroidetes</i>  | 1  |
| CG_17_I     | <i>Rhodoluna limnophila</i>             | 100   | <i>Actinobacteria</i> | 1  |
| CG_14_I*    | <i>Rheinheimera aquatica</i>            | 97.97 | <i>Proteobacteria</i> | 1  |
| CG_11_I     | <i>Brevundimonas denitrificans</i>      | 99.51 | <i>Proteobacteria</i> | 1  |
| CG_8_I      | <i>Devosia insulae</i>                  | 100   | <i>Proteobacteria</i> | 1  |
| CG_2_I      | <i>Fictibacillus barbaricus</i>         | 99.82 | <i>Firmicutes</i>     | 1  |
| CG_1_I_P1   | <i>Bacillus butanolivorans</i>          | 98.49 | <i>Firmicutes</i>     | 1  |
| CA_E_10     | <i>Yonghaparkia alkaliphila</i>         | 98.95 | <i>Actinobacteria</i> | 1  |
| CA_E_9*     | <i>Devosia submarina</i>                | 97.85 | <i>Proteobacteria</i> | 1  |



|             |                                       |       |                       |    |
|-------------|---------------------------------------|-------|-----------------------|----|
| CA_E_2      | <i>Dyadobacter koreensis</i>          | 98.41 | <i>Bacteroidetes</i>  | 1  |
| CA_23_I     | <i>Pseudorhodobacter sinensis</i>     | 97.12 | <i>Proteobacteria</i> | 11 |
| CA_20_I     | <i>Aurantimicrobium minutum</i>       | 98.86 | <i>Actinobacteria</i> | 1  |
| CA_12_I_P1  | <i>Cellulomonas oligotrophica</i>     | 99.91 | <i>Actinobacteria</i> | 1  |
| CA_10_I*    | <i>Aquabacterium commune</i>          | 97.19 | <i>Proteobacteria</i> | 1  |
| CA_8_I      | <i>Acidovorax temperans</i>           | 99.28 | <i>Proteobacteria</i> | 1  |
| CA_1_I_P2   | <i>Arenimonas aquaticum</i>           | 99.03 | <i>Proteobacteria</i> | 1  |
| CG_E_13*    | <i>Dyadobacter sediminis</i>          | 97.23 | <i>Bacteroidetes</i>  | 3  |
| CG_13_I     | <i>Malikia spinosa</i>                | 99.81 | <i>Proteobacteria</i> | 2  |
| CG_9_I_P1   | <i>Aquabacterium citratiphilum</i>    | 99.53 | <i>Proteobacteria</i> | 1  |
| CA_E_6_P2_L | <i>Bosea eneeae</i>                   | 99.7  | <i>Proteobacteria</i> | 7  |
| CA_9_I_P2   | <i>Altererythrobacter troitsensis</i> | 99.15 | <i>Proteobacteria</i> | 1  |
| CA_1_I_P1   | <i>Jeotgalibacillus campisalis</i>    | 99.91 | <i>Firmicutes</i>     | 1  |
| B_15        | <i>Sphingomonas koreensis</i>         | 99.5  | <i>Proteobacteria</i> | 13 |
| B_13        | <i>Microbacterium album</i>           | 98.48 | <i>Actinobacteria</i> | 27 |
| AG_66_I     | <i>Kineococcus radiotolerans</i>      | 98.71 | <i>Actinobacteria</i> | 2  |
| AG_57       | <i>Methylobacterium pseudosasaie</i>  | 99.59 | <i>Proteobacteria</i> | 2  |
| AG_56_I     | <i>Nevskia ramosa</i>                 | 99.56 | <i>Proteobacteria</i> | 2  |
| AG_45_E     | <i>Pseudoxanthomonas mexicana</i>     | 99.83 | <i>Proteobacteria</i> | 19 |
| AG_9_E      | <i>Sphingopyxis chilensis</i>         | 99.34 | <i>Proteobacteria</i> | 3  |
| AA_11_I     | <i>Sphingopyxis solisilvae</i>        | 100   | <i>Proteobacteria</i> | 1  |
| AA_10_I     | <i>Sphingomonas hunanensis</i>        | 99.74 | <i>Proteobacteria</i> | 6  |
| AA_6_I      | <i>Sphingopyxis fribergensis</i>      | 98.89 | <i>Proteobacteria</i> | 3  |
| AA_66_E_P2  | <i>Pseudomonas psychrotolerans</i>    | 100   | <i>Proteobacteria</i> | 1  |
| AG_11_E_P2  | <i>Methylobacterium pseudosasaie</i>  | 99.64 | <i>Proteobacteria</i> | 2  |
| AW_35_I     | <i>Acinetobacter pittii</i>           | 99.91 | <i>Proteobacteria</i> | 1  |
| AW_39_I     | <i>Paracoccus yeei</i>                | 99.56 | <i>Proteobacteria</i> | 2  |
| AW_40_I     | <i>Micrococcus yunnanensis</i>        | 99.35 | <i>Actinobacteria</i> | 3  |

|           |                                |       |                       |    |
|-----------|--------------------------------|-------|-----------------------|----|
| GW_2_I    | <i>Pseudomonas zeshuii</i>     | 99.74 | <i>Proteobacteria</i> | 15 |
| WA_10_E   | <i>Bacillus licheniformis</i>  | 99.34 | <i>Firmicutes</i>     | 13 |
| WA_63_E   | <i>Roseomonas mucosa</i>       | 99.82 | <i>Proteobacteria</i> | 1  |
| WG_2_E    | <i>Bacillus circulans</i>      | 100   | <i>Firmicutes</i>     | 6  |
| SG_E_43   | <i>Skermanella rosea</i>       | 98.4  | <i>Proteobacteria</i> | 1  |
| SA_1_I_P2 | <i>Parasegetibacter terrae</i> | 99.2  | <i>Bacteroidetes</i>  | 1  |
| CA_X_I_P1 | <i>Cellulomonas aerilata</i>   | 100   | <i>Actinobacteria</i> | 1  |

\*Novel bacterial taxo
